# Supplementary material
Source: PubMed Central journal article supplement (PMC2993412)
Supplement: 1010246107_pnas.201010246SI.pdf [file 1010246107_pnas.201010246SI.pdf]

# Supporting Information

Hare et al. 10.1073/pnas.1010246107

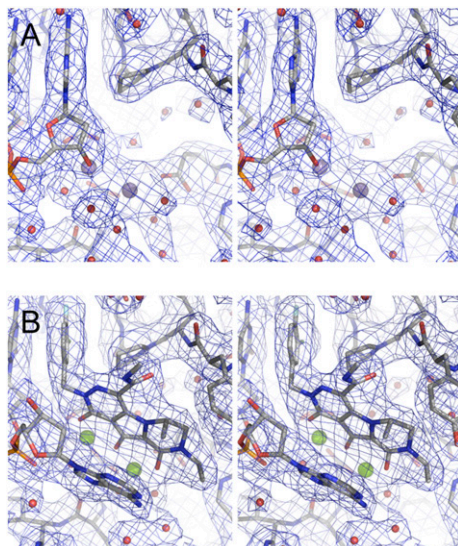

**Fig. S1.** Wall-eye stereo views of the active site of the PFV intasome bound to  $Mn^{2+}$  (A) or  $Mg^{2+}/MK2048$  (B). Standard atom coloring is used throughout with carbon atoms colored gray. Protein and DNA are shown as stick representation, with Mn (purple) and Mg (light green) atoms shown as large spheres and water molecules as small spheres. The  $2F_o-F_c$  weighted map contoured at  $1\sigma$  is shown as a blue mesh.

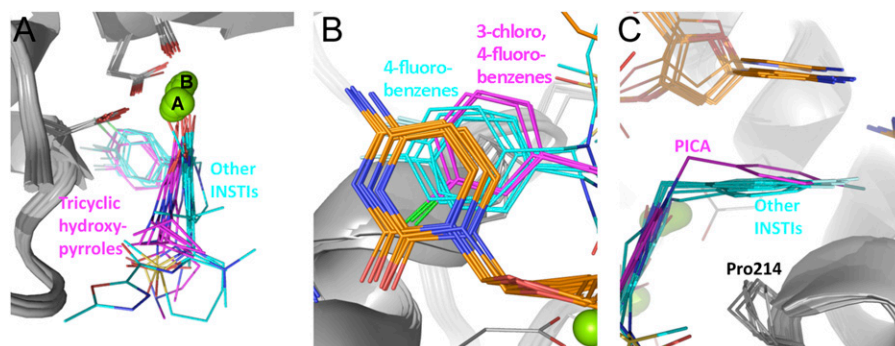

**Fig. S2.** Comparisons of different INSTIs binding to the PFV intasome. (A) INSTI-bound active sites of PFV intasomes viewed along the metal A–metal B axis (a  $90^\circ$  rotation about the vertical axis compared with Fig. 1C). The metals are shown as green spheres and the catalytic side chains and INSTIs are shown as sticks. The carbon atoms of tricyclic hydroxypyrrroles are colored magenta and those of the other INSTIs are cyan, showing the tilt in the core INSTI ring system. (B) Comparison of the interactions between 4-fluoro- (cyan) and 3-chloro,4-fluoro (magenta)-benzene groups of the INSTIs, as viewed from above the penultimate cytosine base of the transferred strand of viral DNA. (C) A side view of the  $\pi$ -stacking interaction between INSTI halobenzene groups and the cytosine base. The halobenzene of PICA (magenta) binds at a different angle to the other INSTIs due to an increased distance between it and the metal chelating pharmacophore.

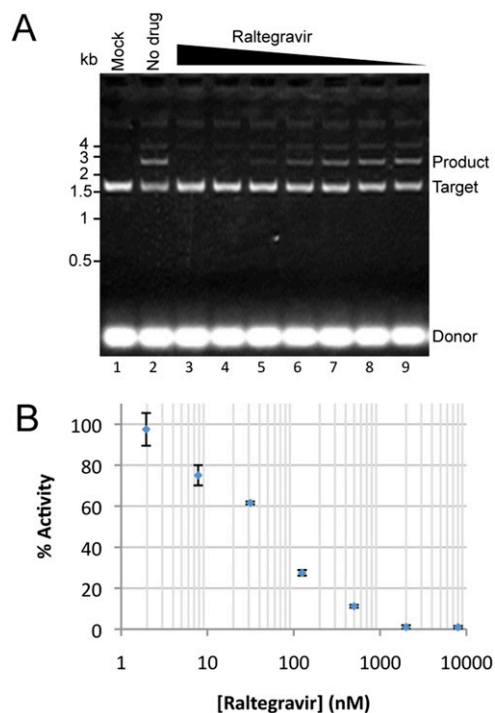

**Fig. 53.** An example of PFV IN strand transfer assay at a range of raltegravir concentrations. (A) Reaction products separated on a 1.5% agarose gel. Migration positions of bands corresponding to donor DNA (a 38-bp mimic of the preprocessed U5 end of PFV DNA), target DNA (supercoiled plasmid), and product (linearized plasmid following concerted integration of two donors) are indicated to the right of the gel image, and the migration position of size standards is indicated to the left. Lane 1 contains the product of a mock reaction with no PFV IN added, and lane 2 shows activity of 0.75  $\mu$ M PFV IN in the absence of the INSTI. Lanes 3–9 also contain 0.75  $\mu$ M PFV IN with a titration of raltegravir from 8  $\mu$ M to 2 nM in a fourfold serial dilution. (B) Scatter graph of relative strand transfer activities against raltegravir concentration; activity in the absence of drug was set to 100%. Integration assay products were analyzed by quantitative real-time PCR in triplicate; mean values are shown with error bars indicating SDs.

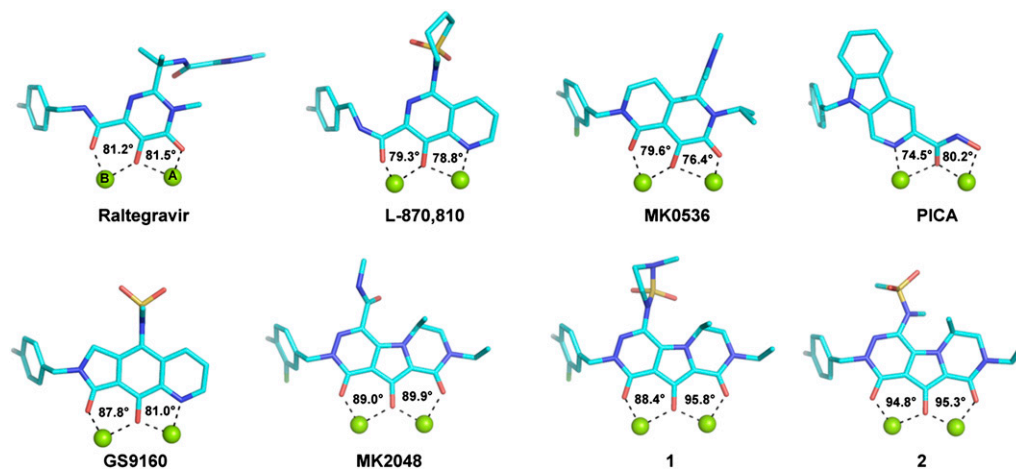

**Fig. 54.** Coordination of the active site magnesium ions by the INSTIs. For each WT:INSTI complex structure drug molecules are shown as sticks and magnesium ions as green spheres, with drug–metal–drug angles shown.

Table S1. Crystallography data collection and refinement statistics

|                                      | WT:Mn                              | WT:raltegravir                     | WT:L870,810                        | WT:MK0536                          | WT:PICA             | WT:GS9160                          | WT:MK2048                          | WT:compound1                       |
|--------------------------------------|------------------------------------|------------------------------------|------------------------------------|------------------------------------|---------------------|------------------------------------|------------------------------------|------------------------------------|
| Data collection*                     |                                    |                                    |                                    |                                    |                     |                                    |                                    |                                    |
| Beamline                             | Diamond I02                        | Soleil Proximal                    | Soleil Proximal                    | Soleil Proximal                    | SLS X06DA           | Soleil Proximal                    | Soleil Proximal                    | Soleil Proximal                    |
| Space group                          | P4 <sub>1</sub> -2 <sub>1</sub> -2 | P41212              | P4 <sub>1</sub> -2 <sub>1</sub> -2 | P4 <sub>1</sub> -2 <sub>1</sub> -2 | P4 <sub>1</sub> -2 <sub>1</sub> -2 |
| Cell dimensions a, b, c, Å           | 160.1,160.1,123.9                  | 159.8,159.8,124.1                  | 159.3,159.3,123.3                  | 159.0,159.0,123.7                  | 160.0,160.0,123.8   | 159.5,159.5,123.6                  | 159.9,159.9,123.3                  | 160.1,160.1,123.5                  |
| Resolution range, Å                  | 40–2.55 (2.69–2.55)                | 40–2.65 (2.79–2.65)                | 40–2.51 (2.65–2.51)                | 40–2.74 (2.89–2.74)                | 40–2.66 (2.80–2.66) | 40–2.54 (2.68–2.54)                | 40–2.54 (2.68–2.54)                | 40–2.56 (2.70–2.56)                |
| R <sub>merge</sub>                   | 0.084 (0.931)                      | 0.097 (0.856)                      | 0.100 (0.869)                      | 0.095 (0.880)                      | 0.077 (0.613)       | 0.108 (1.008)                      | 0.104 (1.044)                      | 0.089 (0.696)                      |
| I/σ(I)                               | 14.1 (2.0)                         | 8.1 (1.6)                          | 10.3 (1.6)                         | 9.8 (1.6)                          | 10.4 (2.0)          | 8.5 (1.6)                          | 11.6 (1.6)                         | 9.7 (1.6)                          |
| Completeness, %                      | 98.9 (99.9)                        | 99.3 (99.2)                        | 96.1 (92.8)                        | 97.8 (99.2)                        | 99.6 (100)          | 99.8 (99.9)                        | 99.5 (99.6)                        | 97.0 (92.6)                        |
| Redundancy                           | 5.5 (5.4)                          | 3.7 (3.6)                          | 5.2 (4.9)                          | 4.7 (4.8)                          | 3.7 (3.7)           | 5.5 (5.5)                          | 5.4 (5.4)                          | 3.9 (3.6)                          |
| Refinement                           |                                    |                                    |                                    |                                    |                     |                                    |                                    |                                    |
| Resolution                           | 39.21–2.55                         | 38.02–2.65                         | 38.65–2.51                         | 39.92–2.74                         | 38.8–2.66           | 39.88–2.54                         | 39.1–2.54                          | 39.15–2.56                         |
| Reflections, total/free              | 49,435/2,627                       | 44,443/2,359                       | 49,439/2,656                       | 39,638/2,098                       | 43,835/2,333        | 50,084/2,669                       | 50,011/2,668                       | 47,710/2,528                       |
| R <sub>work</sub> /R <sub>free</sub> | 0.197/0.222                        | 0.205/0.228                        | 0.204/0.232                        | 0.203/0.236                        | 0.202/0.226         | 0.207/0.234                        | 0.204/0.224                        | 0.205/0.227                        |
| No. atoms                            |                                    |                                    |                                    |                                    |                     |                                    |                                    |                                    |
| Protein                              | 4,339                              | 4,362                              | 4,356                              | 4,343                              | 4,367               | 4,392                              | 4,343                              | 4,352                              |
| Ligand/ion                           | 771                                | 803                                | 801                                | 801                                | 795                 | 800                                | 803                                | 828                                |
| Water                                | 274                                | 234                                | 272                                | 162                                | 245                 | 236                                | 252                                | 240                                |
| Average B-factors, Å <sup>2</sup>    |                                    |                                    |                                    |                                    |                     |                                    |                                    |                                    |
| Protein                              | 58.9                               | 56.4                               | 52.9                               | 69.6                               | 57.3                | 62.7                               | 54.3                               | 57.1                               |
| Ligand/ion                           | 56.3                               | 53.9                               | 50.4                               | 66.8                               | 53.9                | 59.5                               | 51.1                               | 53.5                               |
| Water                                | 54.8                               | 49.7                               | 47.8                               | 59.3                               | 50.1                | 56.6                               | 48.5                               | 50.0                               |
| R.M.S. deviations                    |                                    |                                    |                                    |                                    |                     |                                    |                                    |                                    |
| Bond lengths, Å                      | 0.011                              | 0.012                              | 0.011                              | 0.013                              | 0.011               | 0.012                              | 0.011                              | 0.011                              |
| Bond angles, °                       | 1.50                               | 1.56                               | 1.52                               | 1.58                               | 1.48                | 1.60                               | 1.51                               | 1.49                               |
| Ramachandran, %                      |                                    |                                    |                                    |                                    |                     |                                    |                                    |                                    |
| Favored                              | 96.5                               | 96.9                               | 96.7                               | 95.6                               | 96.9                | 96.9                               | 97.1                               | 97.3                               |
| Outliers                             | 0                                  | 0                                  | 0                                  | 0                                  | 0                   | 0.2                                | 0.2                                | 0                                  |
| PDB ID                               | 3OY9                               | 3OYA                               | 3OYF                               | 3OYH                               | 3OYC                | 3OYD                               | 3OYB                               | 3OYG                               |



**Table S2. Electronic properties of INSTIs**

|             | $q_1$ | $q_2$ | $q_3$ | $f_{\text{NN HOMO}}$ | $\alpha$ |
|-------------|-------|-------|-------|----------------------|----------|
| Raltegravir | -0.5  | -0.62 | -0.64 | 0.357                | 340.12   |
| L-870,810   | -0.58 | -0.52 | -0.82 | 0.6774               | 324.75   |
| MK0536      | -0.49 | -0.63 | -0.62 | 0.2927               | 317.05   |
| PICA        | -0.73 | -0.62 | -0.63 | 0.5746               | 340.99   |
| GS9160      | -0.58 | -0.61 | -0.71 | 0.3958               | 308.96   |
| MK2048      | -0.56 | -0.68 | -0.56 | 0.4266               | 358.11   |
| Compound 1  | -0.56 | -0.68 | -0.58 | 0.4442               | 390.46   |
| Compound 2  | -0.58 | -0.69 | -0.56 | 0.4003               | 375.08   |

Calculated electrostatic potential charges for the three atoms that interact with  $\text{Mg}^{2+}$  ( $q_1$ ,  $q_2$ , and  $q_3$ ) are shown.  $q_1$  is the charge on the atom that is closest to the halo-benzyl group, and  $q_3$  is the charge on the atom that is most distant from the halo-benzyl group.  $f_{\text{NN HOMO}}$ , the atomic Fukui index of the negatively charged oxygen atom that is interacting with  $\text{Mg}^{2+}$ ;  $\alpha$ , polarizability. All properties are in atomic units.

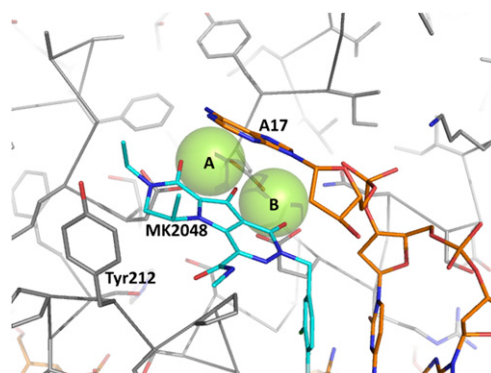

**Movie S1.** Simulation of MK2048 binding at the active site of WT PFV intasome. The protein chain is shown as a  $\text{C}\alpha$  trace. Selected IN residues MK2048 and viral DNA are shown as sticks and indicated; for clarity, 3' adenosine is only shown in the last frame of the animation.

[Movie S1](#)

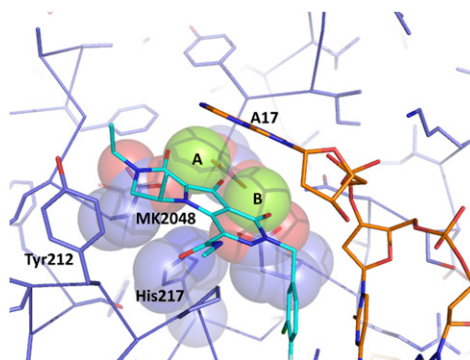

**Movie S2.** Simulation of MK2048 binding at the active site of S217H PFV intasome. To emphasize the steric interactions necessitating displacement of the mutant His residue in the active site, side chains of selected residues are shown as Van der Waals spheres.

[Movie S2](#)

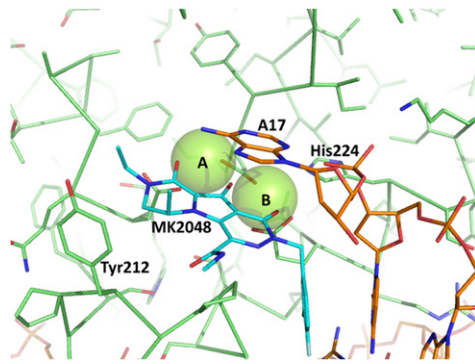

**Movie S3.** Simulation of MK2048 binding at the active site of N224H PFV intasome. The interaction between mutant His224 and the phosphate group of viral DNA is shown as dashes.

[Movie S3](#)
